# Supplementary material for: Maladaptive Eating Behaviours, Generalised Anxiety Disorder and Depression Severity: A Comparative Study between Adult Women with Overweight, Obesity, and Normal Body Mass Index Range
Source: MDPI journal article supplement (doi:10.3390/nu16010080), 2023-12-26
Supplement: s1 [file s1]

Table S1. The English Version of the Study Questionnaire and the distribution of responses among participants in TFEQ-R18, GAD-7 and PHQ-9 questionnaires.

|                                                                                                                                                                                  |                                                                                |
|----------------------------------------------------------------------------------------------------------------------------------------------------------------------------------|--------------------------------------------------------------------------------|
| <b>Demographic variables</b>                                                                                                                                                     |                                                                                |
| <b>How old are you? [years]</b>                                                                                                                                                  |                                                                                |
| <b>Sex</b>                                                                                                                                                                       | Female                                                                         |
|                                                                                                                                                                                  | Male                                                                           |
|                                                                                                                                                                                  | Other                                                                          |
| <b>What is your height? [in centimeters]</b>                                                                                                                                     |                                                                                |
| <b>What is your weight? [in kilograms]</b>                                                                                                                                       |                                                                                |
| <b>Is this currently your highest body weight in your life? For women, if applicable, please exclude weight from pregnancy and postpartum period (6 weeks after childbirth).</b> | Yes                                                                            |
|                                                                                                                                                                                  | No                                                                             |
| <b>Additional question after choosing „No” in Q: Is this currently your highest body weight in your life?</b>                                                                    |                                                                                |
| <b>What was your highest body weight in your life? [in kilograms]</b>                                                                                                            |                                                                                |
| <b>Are you currently using any of the listed medications for treating obesity? (multiple choice)</b>                                                                             | Saxenda or Victoza (active ingredient liraglutide)                             |
|                                                                                                                                                                                  | Ozempic or Wegovy (active ingredient semaglutide)                              |
|                                                                                                                                                                                  | Mysimba (active ingredient Bupropion Hydrochloride + Naltrexone Hydrochloride) |
|                                                                                                                                                                                  | I don't use any of the above                                                   |
|                                                                                                                                                                                  |                                                                                |
| <b>Have you undergone bariatric surgery in the past?</b>                                                                                                                         | Yes                                                                            |
|                                                                                                                                                                                  | No                                                                             |
| <b>Additional question after choosing „Yes” in Q: Have you undergone bariatric surgery in the past?</b>                                                                          |                                                                                |
| <b>What kind of procedure did you have?</b>                                                                                                                                      | Gastric Sleeve surgery                                                         |
|                                                                                                                                                                                  | Gastric Bypass surgery                                                         |
|                                                                                                                                                                                  | Gastric Band surgery                                                           |
|                                                                                                                                                                                  | Endoscopic intragastric balloon                                                |
|                                                                                                                                                                                  | Other                                                                          |
| <b>Do you have any chronic illnesses?</b>                                                                                                                                        | Yes                                                                            |

|                                                                                          |                                                |
|------------------------------------------------------------------------------------------|------------------------------------------------|
|                                                                                          | No                                             |
| <b>Additional question after choosing „Yes“ in Q: Do you have any chronic illnesses?</b> |                                                |
| <b>What chronic illness do you have? (multiple choice)</b>                               | Obesity                                        |
|                                                                                          | Hypertension                                   |
|                                                                                          | Cardiovascular disease other than hypertension |
|                                                                                          | Diabetes Mellitus type 2                       |
|                                                                                          | Arthritis                                      |
|                                                                                          | Hypothyroidism                                 |
|                                                                                          | Depressive Disorder                            |
|                                                                                          | General Anxiety Disorder                       |
|                                                                                          | Dyslipidemia                                   |
|                                                                                          | Hepatic Steatosis                              |
| Other, not mentioned above                                                               |                                                |
| <b>Three Factor Eating-18 Questionnaire (TFEQ-R18)</b>                                   |                                                |
| <b>I deliberately take small helpings as a means of controlling my weight.</b>           | Definitely true                                |
|                                                                                          | Mostly true                                    |
|                                                                                          | Mostly False                                   |
|                                                                                          | Definitely False                               |
| <b>When I feel anxious, I find myself eating.</b>                                        | Definitely true                                |
|                                                                                          | Mostly true                                    |
|                                                                                          | Mostly False                                   |
|                                                                                          | Definitely False                               |
| <b>Being with someone who is eating often makes me hungry enough to eat also.</b>        | Definitely true                                |
|                                                                                          | Mostly true                                    |
|                                                                                          | Mostly False                                   |
|                                                                                          | Definitely False                               |
| <b>When I feel sad, I find myself overeating.</b>                                        | Definitely true                                |
|                                                                                          | Mostly true                                    |
|                                                                                          | Mostly False                                   |
|                                                                                          | Definitely False                               |
| <b>When I see a real delicacy, I often get so hungry that I have to eat right away.</b>  | Definitely true                                |
|                                                                                          | Mostly true                                    |

|                                                                                                                                           |                  |
|-------------------------------------------------------------------------------------------------------------------------------------------|------------------|
|                                                                                                                                           | Mostly False     |
|                                                                                                                                           | Definitely False |
| <b>I get so hungry that my stomach often seems like a bottomless pit.</b>                                                                 | Definitely true  |
|                                                                                                                                           | Mostly true      |
|                                                                                                                                           | Mostly False     |
|                                                                                                                                           | Definitely False |
| <b>I am always hungry so it is hard for me to stop eating before I finish the food on my plate.</b>                                       | Definitely true  |
|                                                                                                                                           | Mostly true      |
|                                                                                                                                           | Mostly False     |
|                                                                                                                                           | Definitely False |
| <b>When I feel lonely, I console myself by eating.</b>                                                                                    | Definitely true  |
|                                                                                                                                           | Mostly true      |
|                                                                                                                                           | Mostly False     |
|                                                                                                                                           | Definitely False |
| <b>I deliberately take small helpings as a means of controlling my weight.</b>                                                            | Definitely true  |
|                                                                                                                                           | Mostly true      |
|                                                                                                                                           | Mostly False     |
|                                                                                                                                           | Definitely False |
| <b>I do not eat some foods because they make me fat.</b>                                                                                  | Definitely true  |
|                                                                                                                                           | Mostly true      |
|                                                                                                                                           | Mostly False     |
|                                                                                                                                           | Definitely False |
| <b>I am always hungry enough to eat at any time.</b>                                                                                      | Definitely true  |
|                                                                                                                                           | Mostly true      |
|                                                                                                                                           | Mostly False     |
|                                                                                                                                           | Definitely False |
| <b>When I smell a sizzling steak or juicy meatloaf I find it very difficult to keep from eating, even if I have just finished a meal.</b> | Definitely true  |
|                                                                                                                                           | Mostly true      |
|                                                                                                                                           | Mostly False     |
|                                                                                                                                           | Definitely False |
| <b>Sometimes when I start eating, I just can't seem to stop.</b>                                                                          | Definitely true  |
|                                                                                                                                           | Mostly true      |

|                                                                                      |                         |
|--------------------------------------------------------------------------------------|-------------------------|
|                                                                                      | Mostly False            |
|                                                                                      | Definitely False        |
| How often do you feel hungry?                                                        | Only at meal times      |
|                                                                                      | Sometimes between meals |
|                                                                                      | Often between meals     |
|                                                                                      | Almost always           |
| How likely are you to consciously eat less than you want?                            | Unlikely                |
|                                                                                      | Slightly likely         |
|                                                                                      | Moderately likely       |
|                                                                                      | Very likely             |
| How frequently do you avoid buying tempting foods?                                   | Almost never            |
|                                                                                      | Seldom                  |
|                                                                                      | Moderately likely       |
|                                                                                      | Almost always           |
| Do you go on eating binges though you are not hungry?                                | Never                   |
|                                                                                      | Rarely                  |
|                                                                                      | Sometimes               |
|                                                                                      | At least once a week    |
| How much do you restrict your food intake? Mark on a scale from 1 to 8.              | 1 (never restricting)   |
|                                                                                      | 2                       |
|                                                                                      | 3                       |
|                                                                                      | 4                       |
|                                                                                      | 5                       |
|                                                                                      | 6                       |
|                                                                                      | 7                       |
|                                                                                      | 8 (always restricting)  |
| <b>General Anxiety Disorder-7 Questionnaire (GAD-7)</b>                              |                         |
| Over the last two weeks, how often have you been bothered by the following problems? |                         |
| Feeling nervous, anxious, or on edge.                                                | Not at all              |
|                                                                                      | Several days            |
|                                                                                      | More than half the days |
|                                                                                      | Nearly every day        |

|                                                                                                  |                         |
|--------------------------------------------------------------------------------------------------|-------------------------|
| Not being able to stop or control worrying.                                                      | Not at all              |
|                                                                                                  | Several days            |
|                                                                                                  | More than half the days |
|                                                                                                  | Nearly every day        |
| Worrying too much about different things.                                                        | Not at all              |
|                                                                                                  | Several days            |
|                                                                                                  | More than half the days |
|                                                                                                  | Nearly every day        |
| Trouble relaxing.                                                                                | Not at all              |
|                                                                                                  | Several days            |
|                                                                                                  | More than half the days |
|                                                                                                  | Nearly every day        |
| Being so restless that it is hard to sit still.                                                  | Not at all              |
|                                                                                                  | Several days            |
|                                                                                                  | More than half the days |
|                                                                                                  | Nearly every day        |
| Becoming easily annoyed or irritable.                                                            | Not at all              |
|                                                                                                  | Several days            |
|                                                                                                  | More than half the days |
|                                                                                                  | Nearly every day        |
| Feeling afraid, as if something awful might happen.                                              | Not at all              |
|                                                                                                  | Several days            |
|                                                                                                  | More than half the days |
|                                                                                                  | Nearly every day        |
| <b>Patients Health Questionnaire-9 (PHQ-9)</b>                                                   |                         |
| <b>Over the last 2 weeks, how often have you been bothered by any of the following problems?</b> |                         |
| Little interest or pleasure in doing things.                                                     | Not at all              |
|                                                                                                  | Several days            |
|                                                                                                  | More than half the days |
|                                                                                                  | Nearly every day        |
| Feeling down, depressed, or hopeless.                                                            | Not at all              |
|                                                                                                  | Several days            |

|                                                                                                                                                                                 |                         |
|---------------------------------------------------------------------------------------------------------------------------------------------------------------------------------|-------------------------|
|                                                                                                                                                                                 | More than half the days |
|                                                                                                                                                                                 | Nearly every day        |
| <b>Trouble falling or staying asleep, or sleeping too much.</b>                                                                                                                 | Not at all              |
|                                                                                                                                                                                 | Several days            |
|                                                                                                                                                                                 | More than half the days |
|                                                                                                                                                                                 | Nearly every day        |
| <b>Feeling tired or having little energy.</b>                                                                                                                                   | Not at all              |
|                                                                                                                                                                                 | Several days            |
|                                                                                                                                                                                 | More than half the days |
|                                                                                                                                                                                 | Nearly every day        |
| <b>Poor appetite or overeating.</b>                                                                                                                                             | Not at all              |
|                                                                                                                                                                                 | Several days            |
|                                                                                                                                                                                 | More than half the days |
|                                                                                                                                                                                 | Nearly every day        |
| <b>Feeling bad about yourself — or that you are a failure or have let yourself or your family down.</b>                                                                         | Not at all              |
|                                                                                                                                                                                 | Several days            |
|                                                                                                                                                                                 | More than half the days |
|                                                                                                                                                                                 | Nearly every day        |
| <b>Trouble concentrating on things, such as reading the newspaper or watching television.</b>                                                                                   | Not at all              |
|                                                                                                                                                                                 | Several days            |
|                                                                                                                                                                                 | More than half the days |
|                                                                                                                                                                                 | Nearly every day        |
| <b>Moving or speaking so slowly that other people could have noticed? Or the opposite — being so fidgety or restless that you have been moving around a lot more than usual</b> | Not at all              |
|                                                                                                                                                                                 | Several days            |
|                                                                                                                                                                                 | More than half the days |
|                                                                                                                                                                                 | Nearly every day        |
| <b>Thoughts that you would be better off dead or of hurting yourself in some way.</b>                                                                                           | Not at all              |
|                                                                                                                                                                                 | Several days            |
|                                                                                                                                                                                 | More than half the days |
|                                                                                                                                                                                 | Nearly every day        |

Table S2. The distribution of the responses among the participants in the Three Factor Eating Questionnaire-18 (TFEQ-R18).

| Three Factor Eating-18 Questionnaire (TFEQ-R18)                                         |                  | n (n%)        |
|-----------------------------------------------------------------------------------------|------------------|---------------|
| <b>I deliberately take small helpings as a means of controlling my weight.</b>          | Definitely true  | 217<br>(19.6) |
|                                                                                         | Mostly true      | 427<br>(38.6) |
|                                                                                         | Mostly False     | 347<br>(41.7) |
|                                                                                         | Definitely False | 114<br>(10.3) |
| <b>When I feel anxious, I find myself eating.</b>                                       | Definitely true  | 281<br>(25.4) |
|                                                                                         | Mostly true      | 305<br>(27.6) |
|                                                                                         | Mostly False     | 345<br>(31.2) |
|                                                                                         | Definitely False | 174<br>(15.7) |
| <b>Being with someone who is eating often makes me hungry enough to eat also.</b>       | Definitely true  | 147<br>(13.3) |
|                                                                                         | Mostly true      | 318<br>(28.8) |
|                                                                                         | Mostly False     | 459<br>(41.5) |
|                                                                                         | Definitely False | 181<br>(16.4) |
| <b>When I feel sad, I find myself overeating.</b>                                       | Definitely true  | 236<br>(21.4) |
|                                                                                         | Mostly true      | 321<br>(29)   |
|                                                                                         | Mostly False     | 372<br>(33.7) |
|                                                                                         | Definitely False | 176<br>(15.9) |
| <b>When I see a real delicacy, I often get so hungry that I have to eat right away.</b> | Definitely true  | 173<br>(15.7) |
|                                                                                         | Mostly true      | 407<br>(36.8) |
|                                                                                         | Mostly False     | 425<br>(38.5) |
|                                                                                         | Definitely False | 100 (9)       |

|                                                                                                     |                  |               |
|-----------------------------------------------------------------------------------------------------|------------------|---------------|
| <b>I get so hungry that my stomach often seems like a bottomless pit.</b>                           | Definitely true  | 167<br>(15.1) |
|                                                                                                     | Mostly true      | 230<br>(20.8) |
|                                                                                                     | Mostly False     | 476<br>(43.1) |
|                                                                                                     | Definitely False | 232<br>(21)   |
| <b>I am always hungry so it is hard for me to stop eating before I finish the food on my plate.</b> | Definitely true  | 106<br>(9.6)  |
|                                                                                                     | Mostly true      | 189<br>(17.1) |
|                                                                                                     | Mostly False     | 487<br>(44.1) |
|                                                                                                     | Definitely False | 323<br>(29.2) |
| <b>When I feel lonely, I console myself by eating.</b>                                              | Definitely true  | 211<br>(19.1) |
|                                                                                                     | Mostly true      | 286<br>(25.9) |
|                                                                                                     | Mostly False     | 358<br>(32.4) |
|                                                                                                     | Definitely False | 250<br>(22.6) |
| <b>I deliberately take small helpings as a means of controlling my weight.</b>                      | Definitely true  | 191<br>(17.3) |
|                                                                                                     | Mostly true      | 482<br>(43.6) |
|                                                                                                     | Mostly False     | 346<br>(31.3) |
|                                                                                                     | Definitely False | 86 (7.8)      |
| <b>I do not eat some foods because they make me fat.</b>                                            | Definitely true  | 311<br>(28.1) |
|                                                                                                     | Mostly true      | 381<br>(34.5) |
|                                                                                                     | Mostly False     | 315<br>(28.5) |
|                                                                                                     | Definitely False | 98 (8.9)      |
| <b>I am always hungry enough to eat at any time.</b>                                                | Definitely true  | 84 (7.6)      |
|                                                                                                     | Mostly true      | 247<br>(22.4) |
|                                                                                                     | Mostly False     | 518<br>(46.9) |
|                                                                                                     | Definitely False | 256<br>(23.2) |



|                                                                                                                                           |                         |               |
|-------------------------------------------------------------------------------------------------------------------------------------------|-------------------------|---------------|
| <b>When I smell a sizzling steak or juicy meatloaf I find it very difficult to keep from eating, even if I have just finished a meal.</b> | Definitely true         | 67 (6.1)      |
|                                                                                                                                           | Mostly true             | 159<br>(14.4) |
|                                                                                                                                           | Mostly False            | 503<br>(45.5) |
|                                                                                                                                           | Definitely False        | 376<br>(34)   |
| <b>Sometimes when I start eating, I just can't seem to stop.</b>                                                                          | Definitely true         | 131<br>(11.9) |
|                                                                                                                                           | Mostly true             | 248<br>(22.4) |
|                                                                                                                                           | Mostly False            | 414<br>(37.5) |
|                                                                                                                                           | Definitely False        | 312<br>(28.2) |
| <b>How often do you feel hungry?</b>                                                                                                      | Only at meal times      | 191<br>(17.3) |
|                                                                                                                                           | Sometimes between meals | 599<br>(54.2) |
|                                                                                                                                           | Often between meals     | 259<br>(23.4) |
|                                                                                                                                           | Almost always           | 56 (5.1)      |
|                                                                                                                                           |                         |               |
| <b>How likely are you to consciously eat less than you want?</b>                                                                          | Unlikely                | 31 (2.8)      |
|                                                                                                                                           | Slightly likely         | 378<br>(34.2) |
|                                                                                                                                           | Moderately likely       | 538<br>(48.7) |
|                                                                                                                                           | Very likely             | 158<br>(14.3) |
| <b>How frequently do you avoid buying tempting foods?</b>                                                                                 | Almost never            | 45 (4.1)      |
|                                                                                                                                           | Seldom                  | 290<br>(26.2) |
|                                                                                                                                           | Moderately likely       | 681<br>(61.6) |
|                                                                                                                                           | Almost always           | 89<br>(8.1%)  |
| <b>Do you go on eating binges though you are not hungry?</b>                                                                              | Never                   | 203<br>(18.4) |
|                                                                                                                                           | Rarely                  | 379<br>(34.3) |
|                                                                                                                                           | Sometimes               | 409<br>(37)   |
|                                                                                                                                           | At least once a week    | 114<br>(10.3) |

|                                                                                |                        |               |
|--------------------------------------------------------------------------------|------------------------|---------------|
| <b>How much do you restrict your food intake? Mark on a scale from 1 to 8.</b> | 1 (never restricting)  | 115<br>(10.4) |
|                                                                                | 2                      |               |
|                                                                                | 3                      | 305<br>(27.6) |
|                                                                                | 4                      |               |
|                                                                                | 5                      | 532<br>(48.1) |
|                                                                                | 6                      |               |
|                                                                                | 7                      | 153<br>(13.8) |
|                                                                                | 8 (always restricting) |               |

Table S3. The distribution of the responses among the participants in the Patients Health Questionnaire-9 (PHQ-9)

| <b>Patients Health Questionnaire-9 (PHQ-9)</b>                                                   |                         | <b>n<br/>(n%)</b> |
|--------------------------------------------------------------------------------------------------|-------------------------|-------------------|
| <b>Over the last 2 weeks, how often have you been bothered by any of the following problems?</b> |                         |                   |
| <b>Little interest or pleasure in doing things.</b>                                              | Not at all              | 275<br>(24.9)     |
|                                                                                                  | Several days            | 460<br>(41.6)     |
|                                                                                                  | More than half the days | 225<br>(20.4)     |
|                                                                                                  | Nearly every day        | 145<br>(13.1)     |
|                                                                                                  |                         |                   |
| <b>Feeling down, depressed, or hopeless.</b>                                                     | Not at all              | 297<br>(26.9)     |
|                                                                                                  | Several days            | 463<br>(41.9)     |
|                                                                                                  | More than half the days | 173<br>(15.7)     |
|                                                                                                  | Nearly every day        | 172<br>(15.6)     |
|                                                                                                  |                         |                   |
| <b>Trouble falling or staying asleep, or sleeping too much.</b>                                  | Not at all              | 226<br>(20.5)     |
|                                                                                                  | Several days            | 342<br>(31)       |
|                                                                                                  | More than half the days | 200<br>(18.1)     |

|                                                                                                                                                                                 |                         |               |
|---------------------------------------------------------------------------------------------------------------------------------------------------------------------------------|-------------------------|---------------|
|                                                                                                                                                                                 | Nearly every day        | 337<br>(30.5) |
|                                                                                                                                                                                 | Not at all              | 89<br>(8.1)   |
|                                                                                                                                                                                 | Several days            | 327<br>(29.6) |
| <b>Feeling tired or having little energy.</b>                                                                                                                                   | More than half the days | 269<br>(24.3) |
|                                                                                                                                                                                 | Nearly every day        | 420<br>(38)   |
|                                                                                                                                                                                 | Not at all              | 290<br>(26.2) |
|                                                                                                                                                                                 | Several days            | 417<br>(37.7) |
| <b>Poor appetite or overeating.</b>                                                                                                                                             | More than half the days | 232<br>(21)   |
|                                                                                                                                                                                 | Nearly every day        | 166<br>(15)   |
|                                                                                                                                                                                 | Not at all              | 334<br>(30.2) |
|                                                                                                                                                                                 | Several days            | 322<br>(29.1) |
| <b>Feeling bad about yourself — or that you are a failure or have let yourself or your family down.</b>                                                                         | More than half the days | 192<br>(17.4) |
|                                                                                                                                                                                 | Nearly every day        | 257<br>(23.3) |
|                                                                                                                                                                                 | Not at all              | 393<br>(35.6) |
|                                                                                                                                                                                 | Several days            | 321<br>(29)   |
| <b>Trouble concentrating on things, such as reading the newspaper or watching television.</b>                                                                                   | More than half the days | 202<br>(18.3) |
|                                                                                                                                                                                 | Nearly every day        | 189<br>(17.1) |
|                                                                                                                                                                                 | Not at all              | 707<br>(64)   |
|                                                                                                                                                                                 | Several days            | 229<br>(20.7) |
| <b>Moving or speaking so slowly that other people could have noticed? Or the opposite — being so fidgety or restless that you have been moving around a lot more than usual</b> | More than half the days | 107<br>(9.7)  |

|                                                                                       |                         |               |
|---------------------------------------------------------------------------------------|-------------------------|---------------|
| <b>Thoughts that you would be better off dead or of hurting yourself in some way.</b> | Nearly every day        | 62<br>(5.6)   |
|                                                                                       | Not at all              | 856<br>(77.5) |
|                                                                                       | Several days            | 152<br>(13.8) |
|                                                                                       | More than half the days | 40<br>(3.6)   |
|                                                                                       | Nearly every day        | 57<br>(5.2)   |

Table S4. The distribution of the responses among the participants in the General Anxiety Disorder-7 Questionnaire (GAD-7)

| <b>General Anxiety Disorder-7 Questionnaire (GAD-7)</b>                                     |                         |               |
|---------------------------------------------------------------------------------------------|-------------------------|---------------|
| <b>Over the last two weeks, how often have you been bothered by the following problems?</b> |                         | <b>n (n%)</b> |
| <b>Feeling nervous, anxious, or on edge.</b>                                                | Not at all              | 186<br>(16.8) |
|                                                                                             | Several days            | 407<br>(36.8) |
|                                                                                             | More than half the days | 216<br>(19.6) |
|                                                                                             | Nearly every day        | 296<br>(26.8) |
| <b>Not being able to stop or control worrying.</b>                                          | Not at all              | 263<br>(23.8) |
|                                                                                             | Several days            | 414<br>(37.5) |
|                                                                                             | More than half the days | 201<br>(18.2) |
|                                                                                             | Nearly every day        | 227<br>(20.5) |
| <b>Worrying too much about different things.</b>                                            | Not at all              | 188 (17)      |
|                                                                                             | Several days            | 387 (35)      |
|                                                                                             | More than half the days | 237<br>(21.4) |
|                                                                                             | Nearly every day        | 293<br>(26.5) |
| <b>Trouble relaxing.</b>                                                                    | Not at all              | 215<br>(19.5) |
|                                                                                             | Several days            | 332 (30)      |
|                                                                                             | More than half the days | 259<br>(23.4) |

|                                                            |                         |               |
|------------------------------------------------------------|-------------------------|---------------|
| <b>Being so restless that it is hard to sit still.</b>     | Nearly every day        | 299<br>(27.1) |
|                                                            | Not at all              | 466<br>(42.2) |
|                                                            | Several days            | 351<br>(31.8) |
|                                                            | More than half the days | 182<br>(16.5) |
|                                                            | Nearly every day        | 106 (9.6)     |
| <b>Becoming easily annoyed or irritable.</b>               | Not at all              | 195<br>(17.6) |
|                                                            | Several days            | 407<br>(36.8) |
|                                                            | More than half the days | 231<br>(20.9) |
|                                                            | Nearly every day        | 272<br>(24.6) |
|                                                            | Not at all              | 453 (41)      |
| <b>Feeling afraid, as if something awful might happen.</b> | Several days            | 325<br>(29.4) |
|                                                            | More than half the days | 157<br>(14.2) |
|                                                            | Nearly every day        | 170<br>(15.4) |
|                                                            |                         |               |
